# Supplementary material for: A holistic approach to dissecting SPARC family protein complexity reveals FSTL-1 as an inhibitor of pancreatic cancer cell growth
Source: PubMed Central journal article supplement (PMC5122892; doi:10.1038/srep37839), 2016-11-25
Supplement: srep37839-s1.pdf [file srep37839-s1.pdf]

**A holistic approach to dissecting SPARC family protein complexity reveals FSTL-1 as an inhibitor of pancreatic cancer cell growth.**

Katrina Vilorio, Amanda Munasinghe, Sharan Asher, Roberto Bogyere, Lucy Jones and Natasha J Hill

## Supplementary Table 1

| Protein                  | Endothelial cells | Fibroblasts | Pancreatic stellate cells | $\beta$ cells | $\beta$ cells |
|--------------------------|-------------------|-------------|---------------------------|---------------|---------------|
|                          | (HUVEC)           | (MRC5)      | (PS1)                     | (INS1)        | (MIN6)        |
| <b>Hevin</b><br>75 kDa   |                   |             | 110                       | 110           | 110           |
|                          | 49                | 49          | 49                        | 49            | 49            |
|                          |                   |             |                           | 39            |               |
| <b>SPOCK-1</b><br>49 kDa |                   |             | 100                       |               | 100           |
|                          |                   |             | 56                        | 56            | 56            |
|                          | 49                | 49          | 49                        | 49            | 49            |
| <b>SPOCK-2</b><br>47 kDa |                   |             | 120                       | 120           | 120           |
|                          |                   |             | 60                        | 60            | 60            |
|                          | 48                | 48          |                           |               |               |
| <b>SPOCK-3</b><br>49 kDa | 65                | 65          | 65                        |               |               |
|                          | 53                | 53          | 53                        | 53            | 53            |
|                          | 34                | 34          | 34                        |               |               |
| <b>SMOC-1</b><br>48 kDa  | 65                |             |                           |               |               |
|                          |                   |             | 53                        | 53            | 53            |
| <b>SMOC-2</b><br>50 kDa  | nd                | nd          | nd                        | nd            | nd            |
| <b>FSTL-1</b><br>35 kDa  | 40                | 40          | 40                        |               |               |

**Supplementary Table 1: SPARC family isoforms and their expression in specific pancreatic cell types.** Molecular weight quantification using Li-Cor Image Studio was performed for all isoforms observed in the western blot experiments shown in Figure 3. The table shows the typical band sizes (kDa) observed for each SPARC family protein in stromal cells (stellate cells, fibroblasts, endothelial cells) and  $\beta$  cells, taken from at least 2 independent blots. The predicted molecular weight for each SPARC family protein is indicated in the first column (the unmodified primary variant). nd = not detected.

## Supplementary Table 2

|                | Predicted Glycosylation sites                  |                                                        |                           | Predicted Phosphorylation sites                               |                             |
|----------------|------------------------------------------------|--------------------------------------------------------|---------------------------|---------------------------------------------------------------|-----------------------------|
|                | N-linked                                       | O-linked                                               | Total Glycosylation sites | Phosphorylation                                               | Total Phosphorylation sites |
| <b>Hevin</b>   | Asn169, Asn176, Asn196, Asn280, Asn412, Asn476 | Thr31, Thr40, Ser44, Thr116, Thr331, Thr398,           | 12                        | Ser92, Ser127, Thr149, Ser182, Ser414, Thr419, Ser420, Ser421 | 8                           |
| <b>SPOCK-1</b> |                                                | Ser131, Thr228, Ser383 (GAG), Ser388 (GAG)             | 4                         | Tyr65, Ser131, Ser144, Ser150, Thr346, Ser351, Thr352         | 7                           |
| <b>SPOCK-2</b> | Asn225                                         | Ser383 (GAG), Ser388 (GAG)                             | 3                         | Thr154, Tyr155, Ser156                                        | 3                           |
| <b>SPOCK-3</b> |                                                | Ser384 (GAG), Ser389 (GAG)                             | 2                         | Ser223, Ser225, Tyr365, Ser372                                | 4                           |
| <b>SMOC-1</b>  | Asn214, Asn374                                 | Ser37, Thr163, Ser168, Ser172, Thr300, Thr301, Ser351, | 9                         | Thr155                                                        | 1                           |
| <b>SMOC-2</b>  | Asn206, Asn362                                 |                                                        | 2                         | Tyr193                                                        | 1                           |
| <b>FSTL-1</b>  | Asn144, Asn175, Asn180                         |                                                        | 3                         | Ser165, Ser166, Thr279, Thr284, Tyr286                        | 5                           |

**Supplementary Table 2: Predicted post-translational modifications of SPARC family proteins.** Potential glycosylation and phosphorylation sites for each of the extended family of SPARC proteins were predicted using Genecards, UNIPROT, and Phosphosite Plus databases. Positions of known glycosaminoglycan (GAG) chain linkages are also indicated.

## Supplementary Table 3

| Gene name<br>(total no. coding<br>variants) | Transcript<br>Name | ENSEMBL<br>Transcript<br>ID | Base pairs | Amino acids | Predicted<br>Protein size<br>(kDa) |
|---------------------------------------------|--------------------|-----------------------------|------------|-------------|------------------------------------|
| <i>SPARCL1</i><br>( <i>Hevin</i> )<br>(10)  | 201                | 418378                      | 2994       | 664         | 75                                 |
|                                             | 001                | 282470                      | 2906       | 664         | 75                                 |
|                                             | 005                | 503414                      | 2520       | 539         | 62                                 |
| <i>SPOCK-1</i><br>(5)                       | 001                | 394945                      | 4846       | 439         | 49                                 |
|                                             | 201                | 282223                      | 4488       | 377         | 33                                 |
| <i>SPOCK-2</i><br>(4)                       | 004                | 373109                      | 5445       | 424         | 47                                 |
|                                             | 201                | 317376                      | 5328       | 424         | 47                                 |
|                                             | 203                | 536168                      | 1824       | 423         | 47                                 |
|                                             | 202                | 412663                      | 1284       | 77          | 8                                  |
| <i>SPOCK-3</i><br>(17)                      | 001                | 357154                      | 2986       | 436         | 49                                 |
|                                             | 002                | 502330                      | 2180       | 436         | 49                                 |
|                                             | 006                | 357545                      | 2936       | 433         | 49                                 |
|                                             | 012                | 511269                      | 1768       | 433         | 49                                 |
|                                             | 014                | 506886                      | 2947       | 436         | 49                                 |
|                                             | 015                | 511531                      | 2908       | 436         | 49                                 |
|                                             | 016                | 504953                      | 2900       | 433         | 49                                 |
|                                             | 013                | 510741                      | 1963       | 393         | 44                                 |
|                                             | 201                | 421836                      | 3061       | 385         | 44                                 |
|                                             | 017                | 535728                      | 2007       | 344         | 39                                 |
|                                             | 010                | 512681                      | 1457       | 338         | 38                                 |
|                                             | 202                | 541354                      | 2797       | 316         | 37                                 |
| 005                                         | 512648             | 1456                        | 313        | 36          |                                    |
| <i>SMOC-1</i><br>(2)                        | 001                | 361956                      | 2040       | 435         | 48                                 |
|                                             | 002                | 381280                      | 3666       | 434         | 48                                 |
| <i>SMOC-2</i><br>(4)                        | 002                | 354536                      | 3150       | 457         | 51                                 |
|                                             | 001                | 356284                      | 3117       | 446         | 50                                 |
|                                             | 201                | 535039                      | 1875       | 136         | 14                                 |
| <i>FSTL-1</i><br>(4)                        | 001                | 295633                      | 5943       | 308         | 35                                 |
|                                             | 004                | 424703                      | 1396       | 273         | 31                                 |

### Supplementary Table 3: Bioinformatics analysis of splice variants of SPARC family proteins.

Alternative transcripts of the wider SPARC family were obtained from the ENSEMBL database. The total number of CDS transcripts is indicated in the first column. Only protein coding variants for which the complete CDS is known were included in further analyses. For these sequences, FASTA sequences were downloaded and the respective product molecular weight was calculated using the Protein Molecular Weight Bioinformatics tool.

## Supplementary Table 4

| Primer name    | sequence                 | primary target transcript ID | primary PCR prod length | Transcripts with differential product length       |
|----------------|--------------------------|------------------------------|-------------------------|----------------------------------------------------|
| <b>GenAFor</b> | TCGGACGGCGGTAATTTTCT     | 006 (generic)                | 158                     | 201 (238 bp), long variants with exon 8/9 (167 bp) |
| <b>GenARev</b> | GGATCTAAAGCCTGATCGAAGG   |                              |                         |                                                    |
| <b>GenBFor</b> | CGCACTTGGAGTCCAGGAAA     | 006 (generic)                | 740                     | 202 (625 bp), 013 (620 bp), 018 (386 bp)           |
| <b>GenBRev</b> | CAAGGTGGGTCTTGCTGTCT     |                              |                         |                                                    |
| <b>005For</b>  | AGAAATGTTAAGAGAGCATGCAG  | 005                          | 386                     |                                                    |
| <b>005Rev</b>  | TTGCGTCTGTAAGGGTCTCA     |                              |                         |                                                    |
| <b>202Rev</b>  | CCTGCTTCTTTCATCCCTGATCG  | 202                          | 154                     |                                                    |
| <b>010For</b>  | TTCCGAGACTGCAAAC TAGAAT  | 010                          | 476                     |                                                    |
| <b>013Rev</b>  | GCTGGTATCGAATCCTCTCTTAAC | 013                          | 402                     |                                                    |
| <b>201For</b>  | GATCACACAAGATCACATCCACA  | 201                          | 215                     |                                                    |
| <b>201Rev</b>  | CTTCTTTCATCCTGTGTGTAAGCC |                              |                         |                                                    |

**Supplementary Table 4: SPOCK-3 primers used for splice variant analysis.**

## Supplementary Table 5

|                      | <b>Immunogen</b>      | <b>Stock Concentration</b> | <b>IHC titrations</b> | <b>Optimal IHC concentration</b> | <b>WB concentration</b> | <b>Manufacturer</b>    |
|----------------------|-----------------------|----------------------------|-----------------------|----------------------------------|-------------------------|------------------------|
| <b>SPARCL1/Hevin</b> | 215-244               | 0.5 mg/ml                  | 1/100-1/800           | 1/100-1/200                      | 1/300                   | Abcam (ab107533)       |
| <b>SPARCL1/Hevin</b> | 649-664<br>C terminus | 0.5 mg/ml                  |                       |                                  | 1/500                   | LS Bio (LS-C313206)    |
| <b>SPOCK-1</b>       | 31-61                 | 0.25 mg/ml                 | 1/25 - 1/200          | 1/25-1/50                        | 1/500                   | Abcam (ab174479)       |
| <b>SPOCK-2</b>       | 200-250               | 0.4 mg/ml                  | 1/100 - 1/400         | 1/100-1/200                      | 1/300                   | Novus Bio (NBPI-92442) |
| <b>SPOCK-3</b>       | 71-365                | 1 mg/ml                    | 1/200 - 1/800         | 1/200-1/400                      | 1/500                   | Abcam (ab111897)       |
| <b>SMOC-1</b>        | 140-363               | 0.9 mg/ml                  | 1/50 - 1/200          | 1/100-1/200                      | 1/500                   | Abcam (ab155776)       |
| <b>SMOC-2</b>        | N terminus            | 0.5 mg/ml                  | 1/25 - 1/400          | 1/100-1/200                      | 1/500                   | Abcam (ab78069)        |
| <b>FSTL-1</b>        | Internal              | 0.3 mg/ml                  | 1/50 - 1/100          | 1/50                             | 1/300                   | Novus Bio (NBPI-83425) |
| <b>SPARC</b>         | 1-90                  | 200 µg/ml                  |                       |                                  | 1/1000                  | Santa Cruz (H-90)      |

**Supplementary Table 5: SPARC family antibodies used in the study.** Table shows details of the SPARC family antibodies used, including manufacturer and concentrations used.

# Supplementary Figure 1

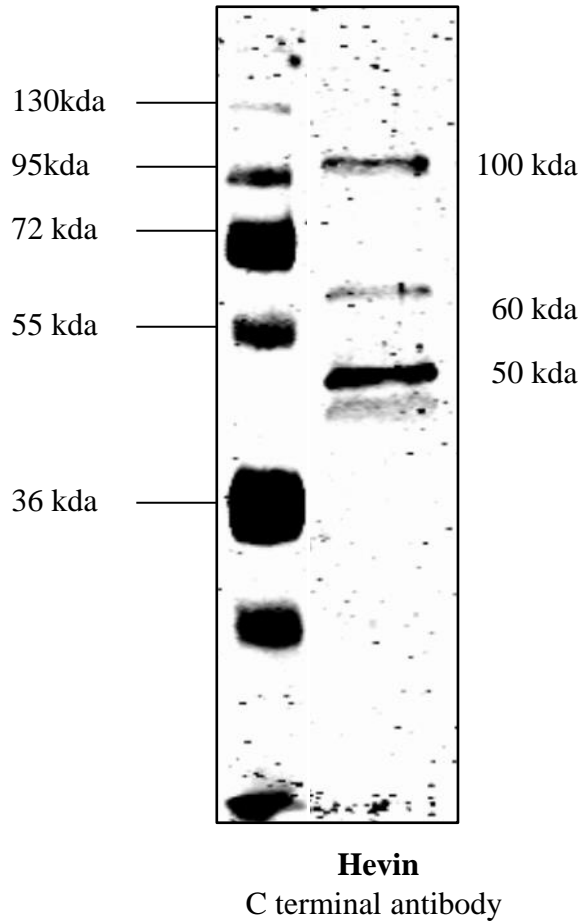

**Supplementary Figure 1: Detection of Hevin isoforms using a C-terminal antibody.** Isoforms of Hevin expressed in PS-1 cells were determined by western blot using an anti-Hevin antibody specific to the C' terminus of Hevin. Images representative of n=3 from 3 independent replicates, where the labelled bands were consistently observed.

# Supplementary Figure 2

## A. Hevin

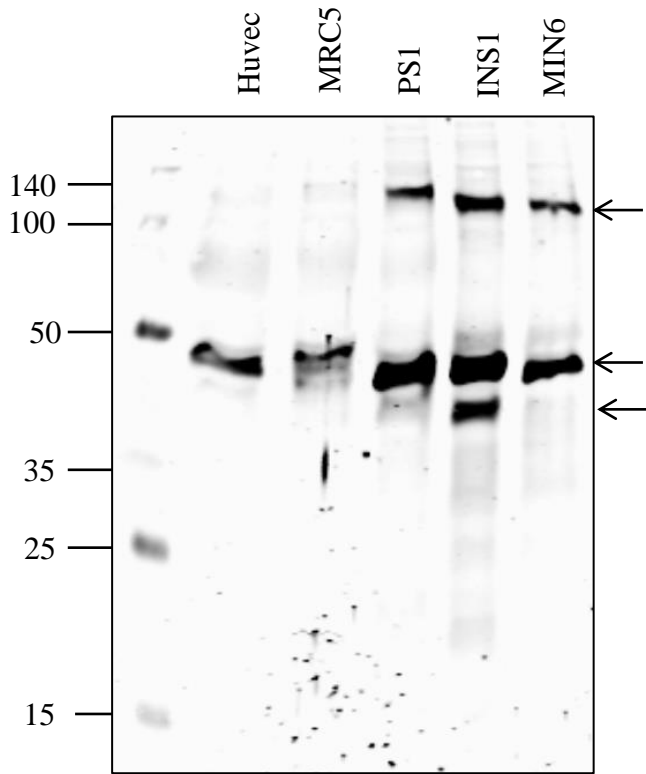

## B. SPOCK-1

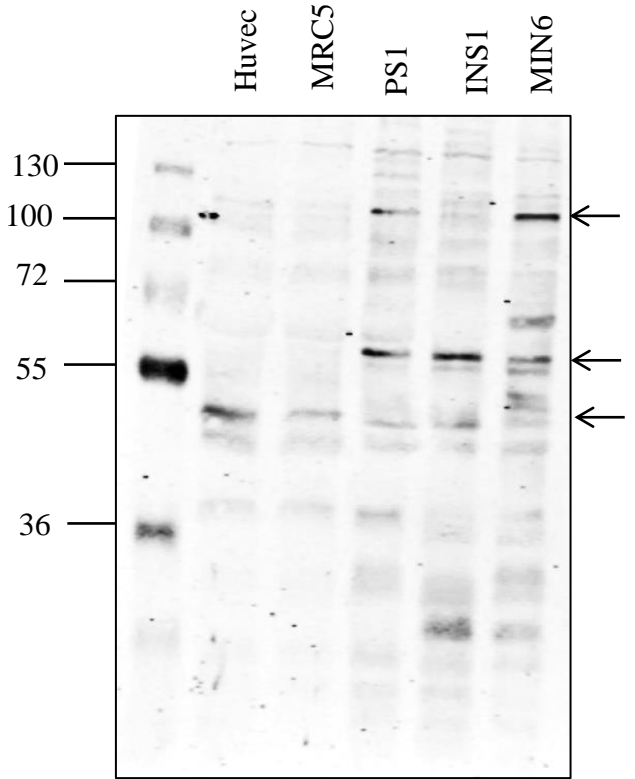

## C. SPOCK-2

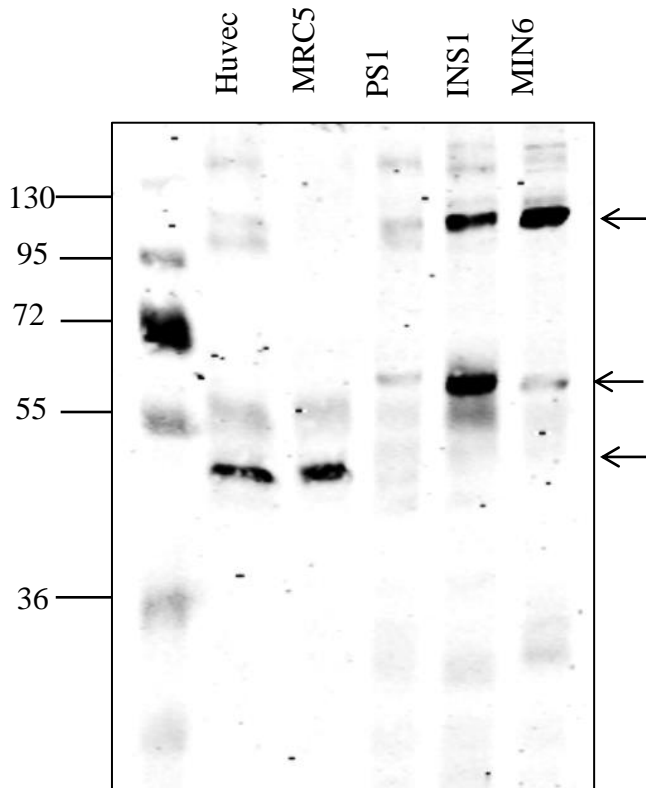

## D. SPOCK-3

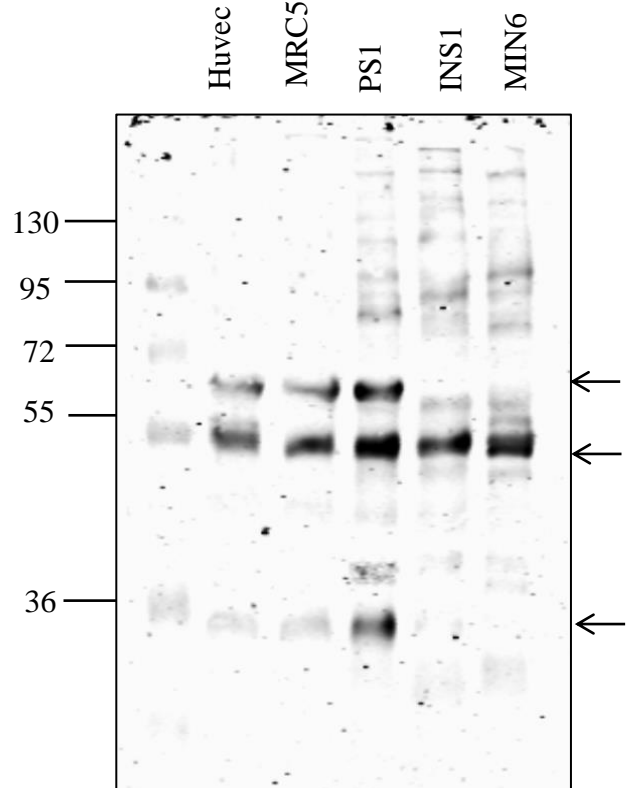



## Supplementary Figure 2

### E. SMOC-1

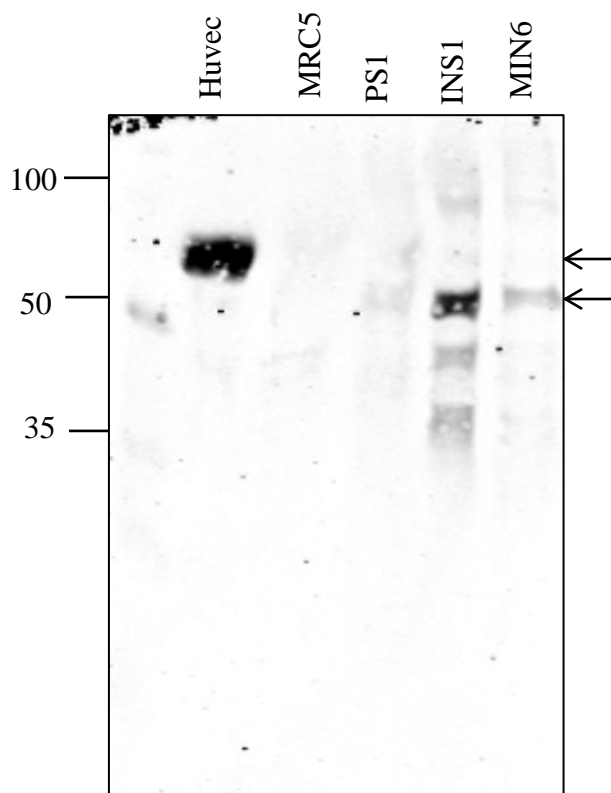

### F. FSTL-1

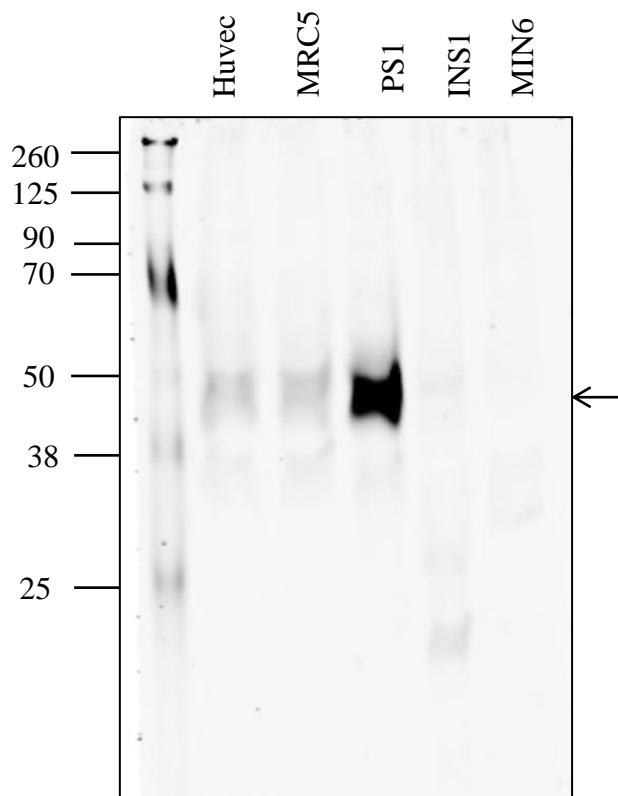

**Supplementary Figure 2: Full blots for cropped images shown in Figure 5. Arrows indicate bands observed across multiple experiments that are shown in Figure 5.**

## Supplementary Figure 3

| Ref | 5'UTR  |        |        |        | CDS    |        |        |        |        |         |         |         |         |         |         |         |         |         |         |   |
|-----|--------|--------|--------|--------|--------|--------|--------|--------|--------|---------|---------|---------|---------|---------|---------|---------|---------|---------|---------|---|
|     | exon 1 | exon 2 | exon 3 | exon 4 | exon 5 | exon 6 | exon 7 | exon 8 | exon 9 | exon 10 | exon 11 | exon 12 | exon 13 | exon 14 | exon 15 | exon 16 | exon 17 | exon 18 | exon 19 |   |
| 001 |        |        |        |        | *      |        |        |        |        |         |         |         |         |         |         |         |         |         |         | ^ |
| 014 |        |        |        |        | *      |        |        |        |        |         |         |         |         |         |         |         |         |         |         | ^ |
| 002 |        |        |        |        | *      |        |        |        |        |         |         |         |         |         |         |         |         |         |         | ^ |
| 015 |        |        |        |        | *      |        |        |        |        |         |         |         |         |         |         |         |         |         |         | ^ |
| 006 |        |        |        |        | * →    |        |        |        |        |         | ←       |         |         |         |         |         |         |         |         | ^ |
| 016 |        |        |        |        | *      |        |        |        |        | ←       |         |         |         |         |         |         | ←       |         |         | ^ |
| 012 |        |        |        | *      |        |        |        |        |        |         |         |         |         |         |         |         |         |         |         | ^ |
| 201 |        |        |        |        |        | →*     |        |        |        |         | ←       |         |         |         |         |         |         |         |         | ^ |
| 013 |        |        |        |        | *      |        |        |        |        | ←       |         |         |         |         | ←       |         |         |         |         | ^ |
| 017 |        |        |        |        |        |        |        |        |        | *       |         |         |         |         |         |         |         |         |         | ^ |
| 010 |        |        |        |        | *      | ←      | ←      | ←      | ←      | ←       | ←       | ←       | ←       | ←       | ←       | ←       | ←       | ←       | ←       | ^ |
| 202 |        |        |        |        | →      |        |        |        |        |         | ←       |         |         |         |         |         |         |         |         | ^ |
| 005 |        |        |        |        | *      |        |        |        |        |         | ←       |         |         | *       |         | ←       |         |         |         | ^ |

**Supplementary Figure 3: Exon structure of SPOCK-3 splice variants.** Splice variants banked in ENSEMBL (Accessed March 2013) for SPOCK-3 (ENSG 196104), showing 5'UTR and CDS exons. The first column indicates the ENSEMBL transcript reference. Shaded boxes indicate exons present in each variant. Long variants are designated in blue (49 kDa), medium in green (44 kDa), small in red (36-39 kDa). Shading indicates the presence of the particular exon. \* indicates translational start site, while ^ indicates translation termination site. Diagram is not to scale. Blue arrows indicate position of forward and reverse primers. The primers shown on transcript 006 and 0016 indicate position of GenA and GenB primers, respectively. All other primers correspond to the indicated transcript. Primer sequences and predicted PCR product sizes are given in Supplementary Table 2.

# Supplementary Figure 4

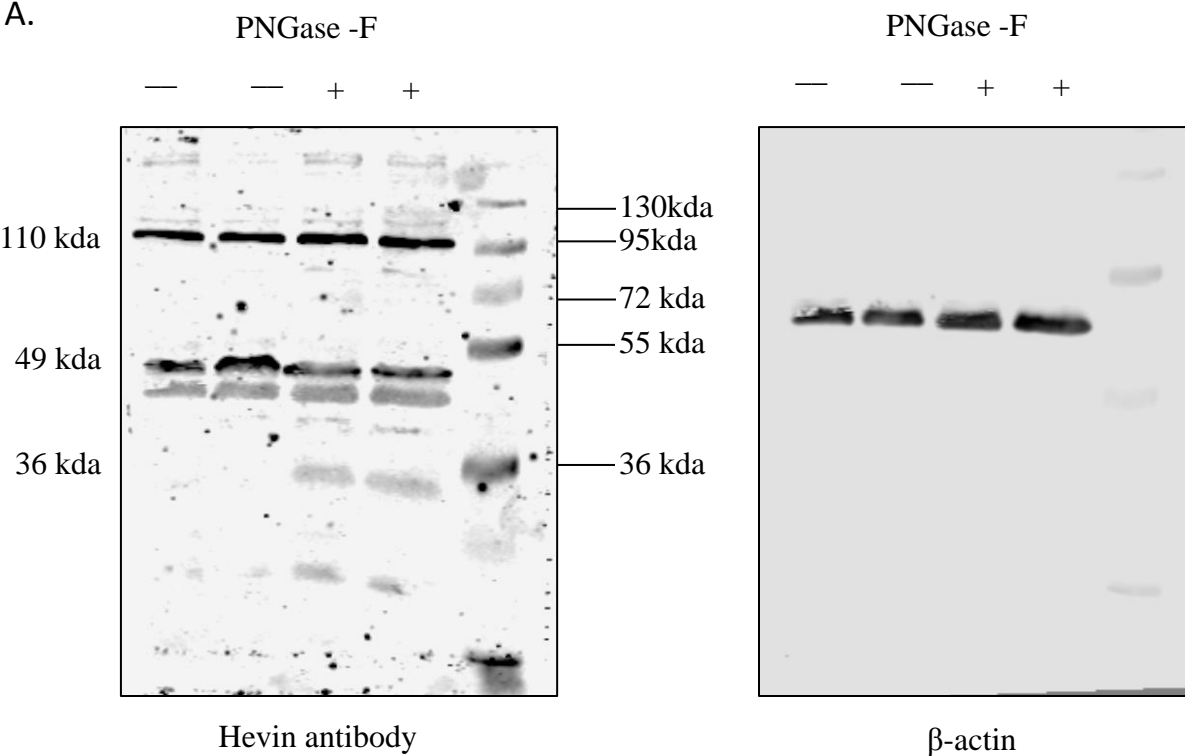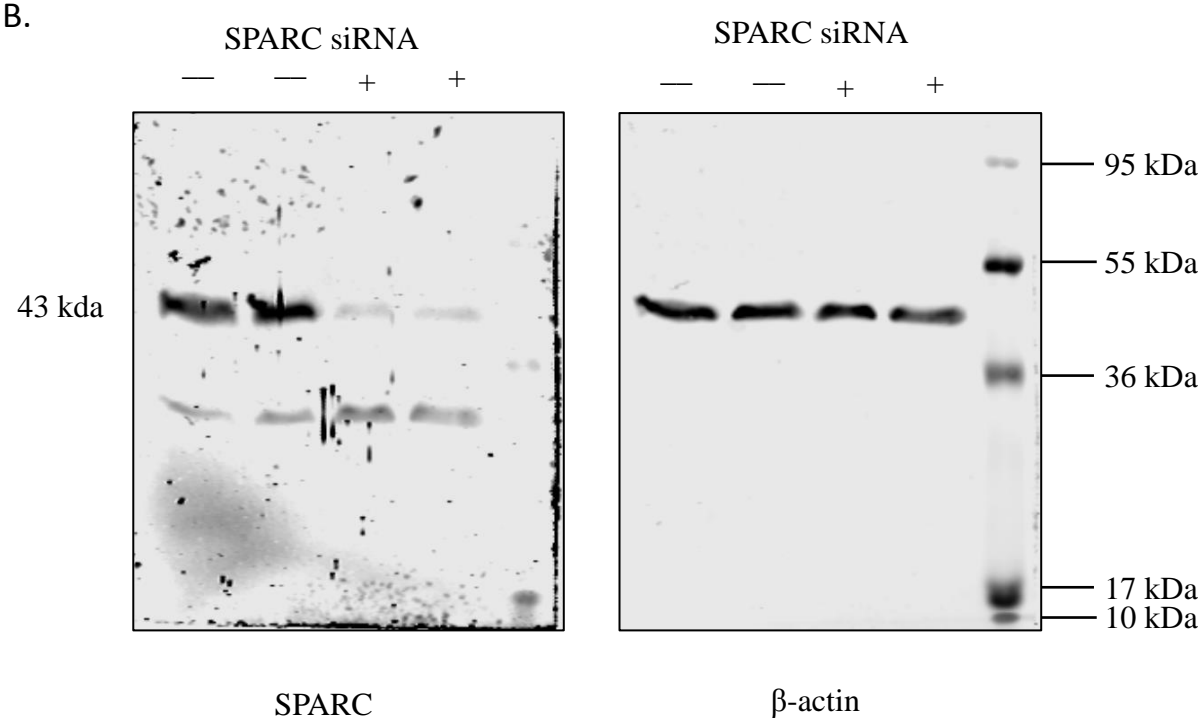

# Supplementary Figure 4

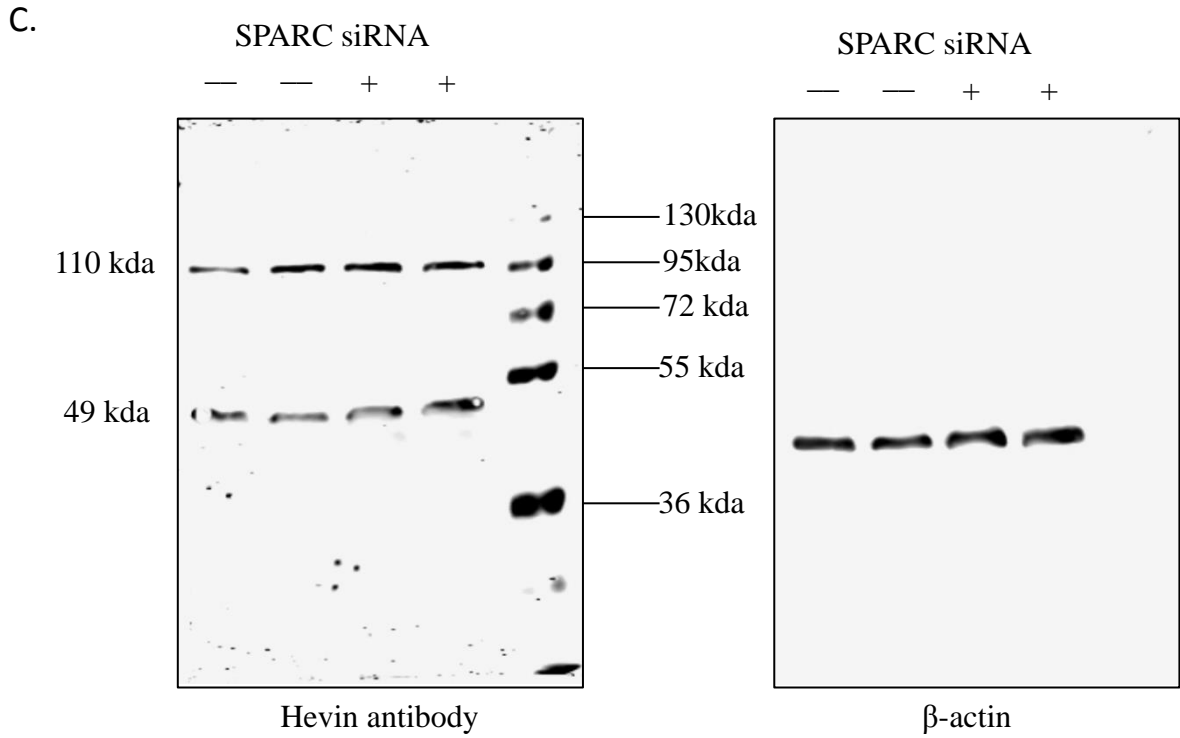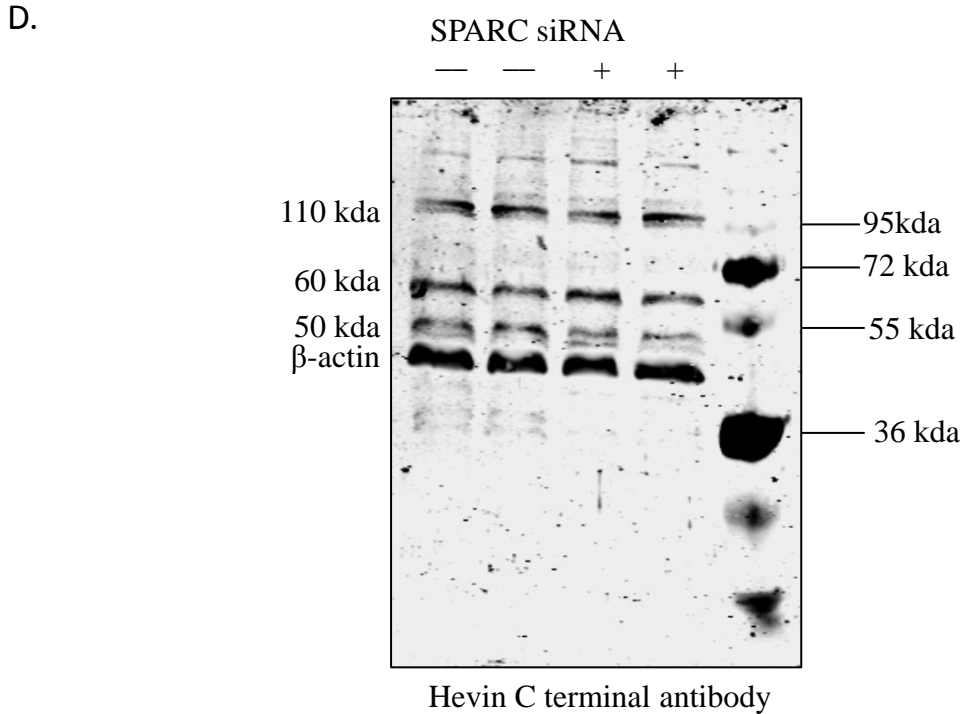

**Supplementary Figure 4: Full blots for cropped images in Figure 7.** See Figure 7 legend for experimental details. In (B), the ~30 kDa band detected with the SPARC antibody is a routinely observed non-specific band that is not affected by SPARC siRNA treatment.

# Supplementary Figure 5

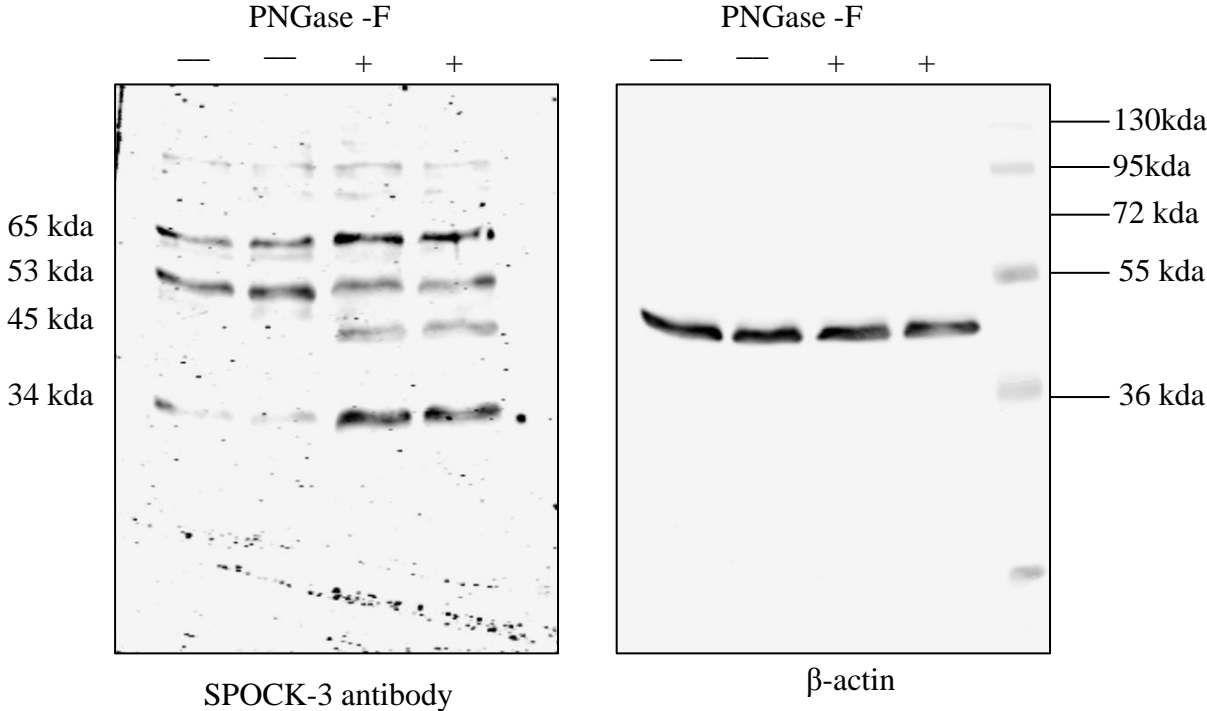

**Supplementary Figure 5: Full blots for cropped images in Figure 8. See Figure 8 legend for experimental details.**

# Supplementary Figure 6

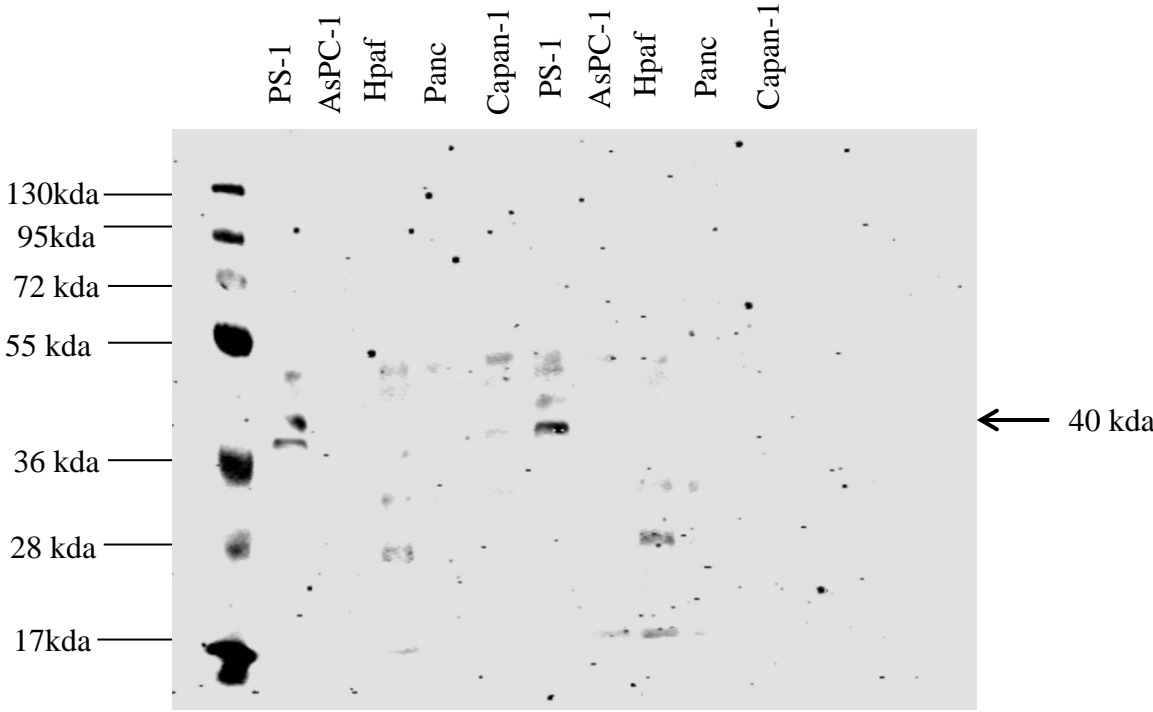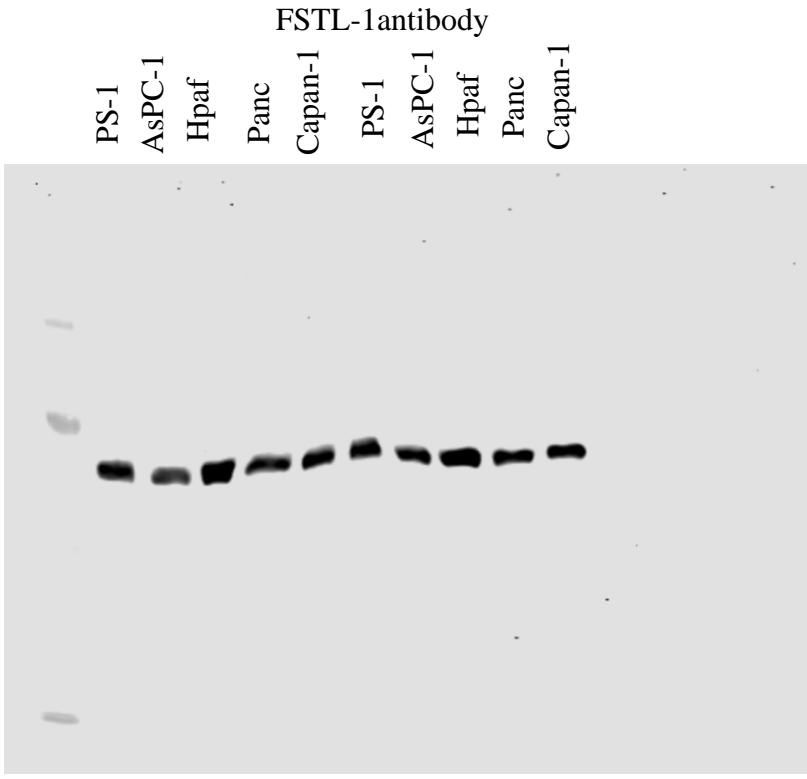

**Supplementary Figure 6: Full blots for cropped blot in Figure 10D.** See Figure 10 legend for experimental details. Arrow indicates consistently observed band at 40 kDa for FSTL-1.
